# Supplementary material for: Characterization of the binding mode of the PET tracer [18F]ASEM to a chimera structure of the α7 nicotinic acetylcholine receptor
Source: Royal Society of Chemistry journal article supplement (doi:10.1039/c7ra00496f), 2017-01-01
Supplement: c7ra00496f1.pdf [file c7ra00496f1.pdf]

## Supporting Information of

# Characterization of the Binding Mode of the PET Tracer [<sup>18</sup>F]ASEM with a Chimera Structure of the $\alpha 7$ Nicotinic Acetylcholine Receptor

Guanglin Kuang,<sup>a</sup> Yang Zhou,<sup>a</sup> Rongfeng Zou,<sup>a</sup> Christer Halldin,<sup>b</sup> Agneta Nordberg,<sup>c</sup> Bengt Långström,<sup>d</sup> Hans Ågren<sup>a</sup> and Yaoquan Tu<sup>a,\*</sup>

<sup>a</sup> Division of Theoretical Chemistry and Biology, School of Biotechnology, Royal Institute of Technology (KTH), AlbaNova University Center, S-106 91, Stockholm, Sweden

<sup>b</sup> Karolinska Institutet, Department of Clinical Neuroscience, Centre for Psychiatric Research, 171 76, Stockholm, Sweden

<sup>c</sup> Department of Neurobiology, Care Sciences and Society, Center of Alzheimer Research, Translational Alzheimer Neurobiology, Karolinska University Hospital, Huddinge, S-141 86, Stockholm, Sweden

<sup>d</sup> Department of Chemistry, Uppsala University, 751 23 Uppsala, Sweden

\* E-mail: yaoquan@kth.se.

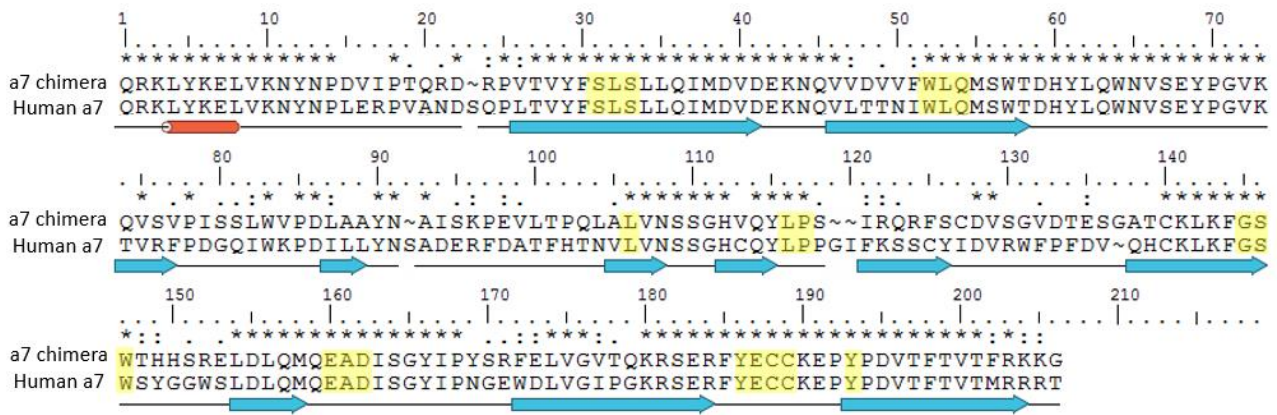

**Supplementary Fig. S1.** Sequence alignment between  $\alpha 7$ -AChBP with  $\alpha 7$ -nAChR. Yellow indicates binding site residues. Secondary structures are shown schematically below the sequence.

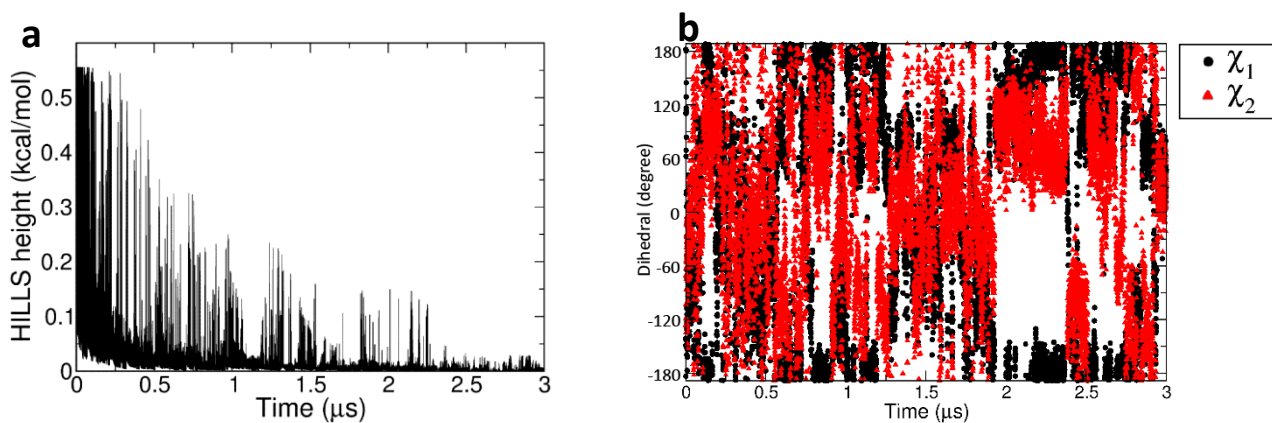

**Supplementary Fig. S2.** (a) Evolution of the HILLS height of the Gaussian potentials added in the metadynamics simulation for the holo-system. (b) Evolution of two collective variables (the side chain dihedral angles  $\chi_1$  and  $\chi_2$  of Trp53) in the metadynamics simulation for the holo-system.

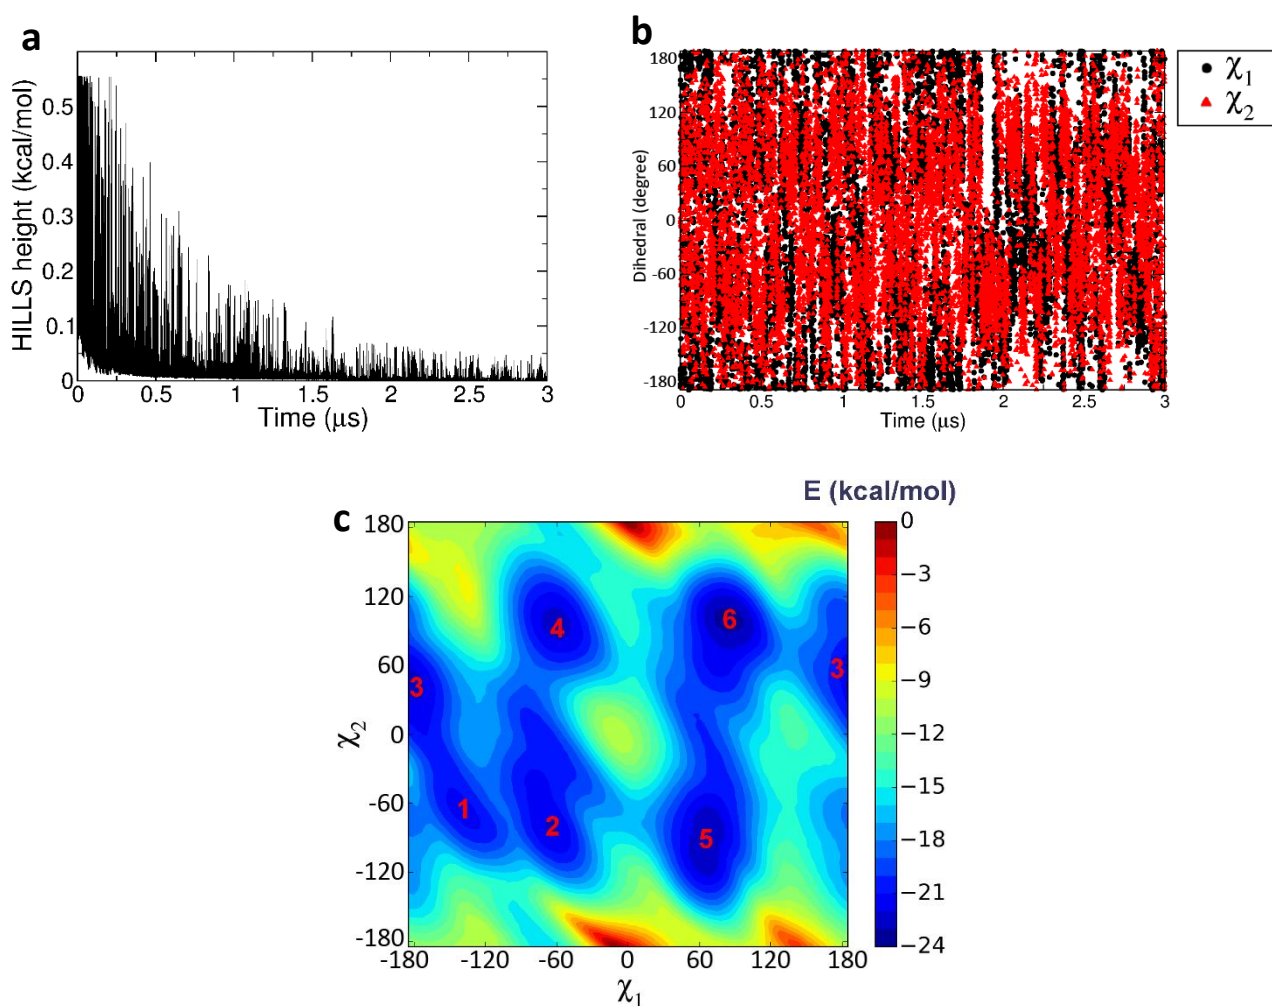

**Supplementary Fig. S3.** (a) Evolution of the HILLS height of the Gaussian potentials added in the metadynamics simulation for the apo-system. (b) Evolution of two collective variables (the side chain dihedral angles  $\chi_1$  and  $\chi_2$  of Trp53) in the metadynamics simulation for the apo-system. (c) Free energy surface (FES) with respect to the two collective variables obtained from metadynamics simulation for the apo-system.

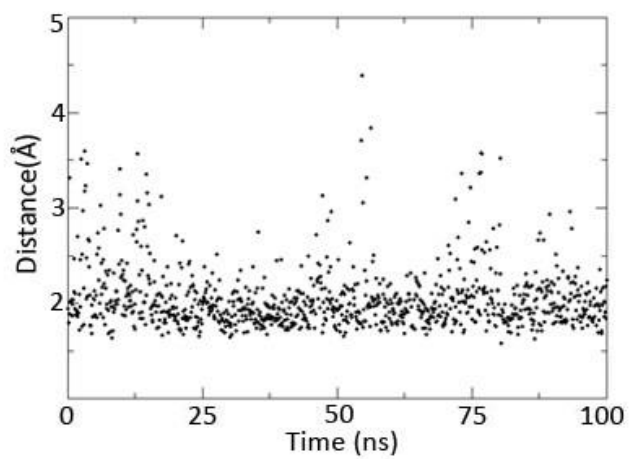

**Supplementary Fig. S4.** Evolution of the distance between the polar hydrogen on the diazobicyclic head group of ASEM and the backbone oxygen of Trp145 for state 5.

**Supplementary Table S1.** Evolution of  $\chi_1$  and  $\chi_2$  of Trp53 of the  $\alpha 7$ -AChBP/ASEM complex.

For each state, three independent MD simulations were carried out.

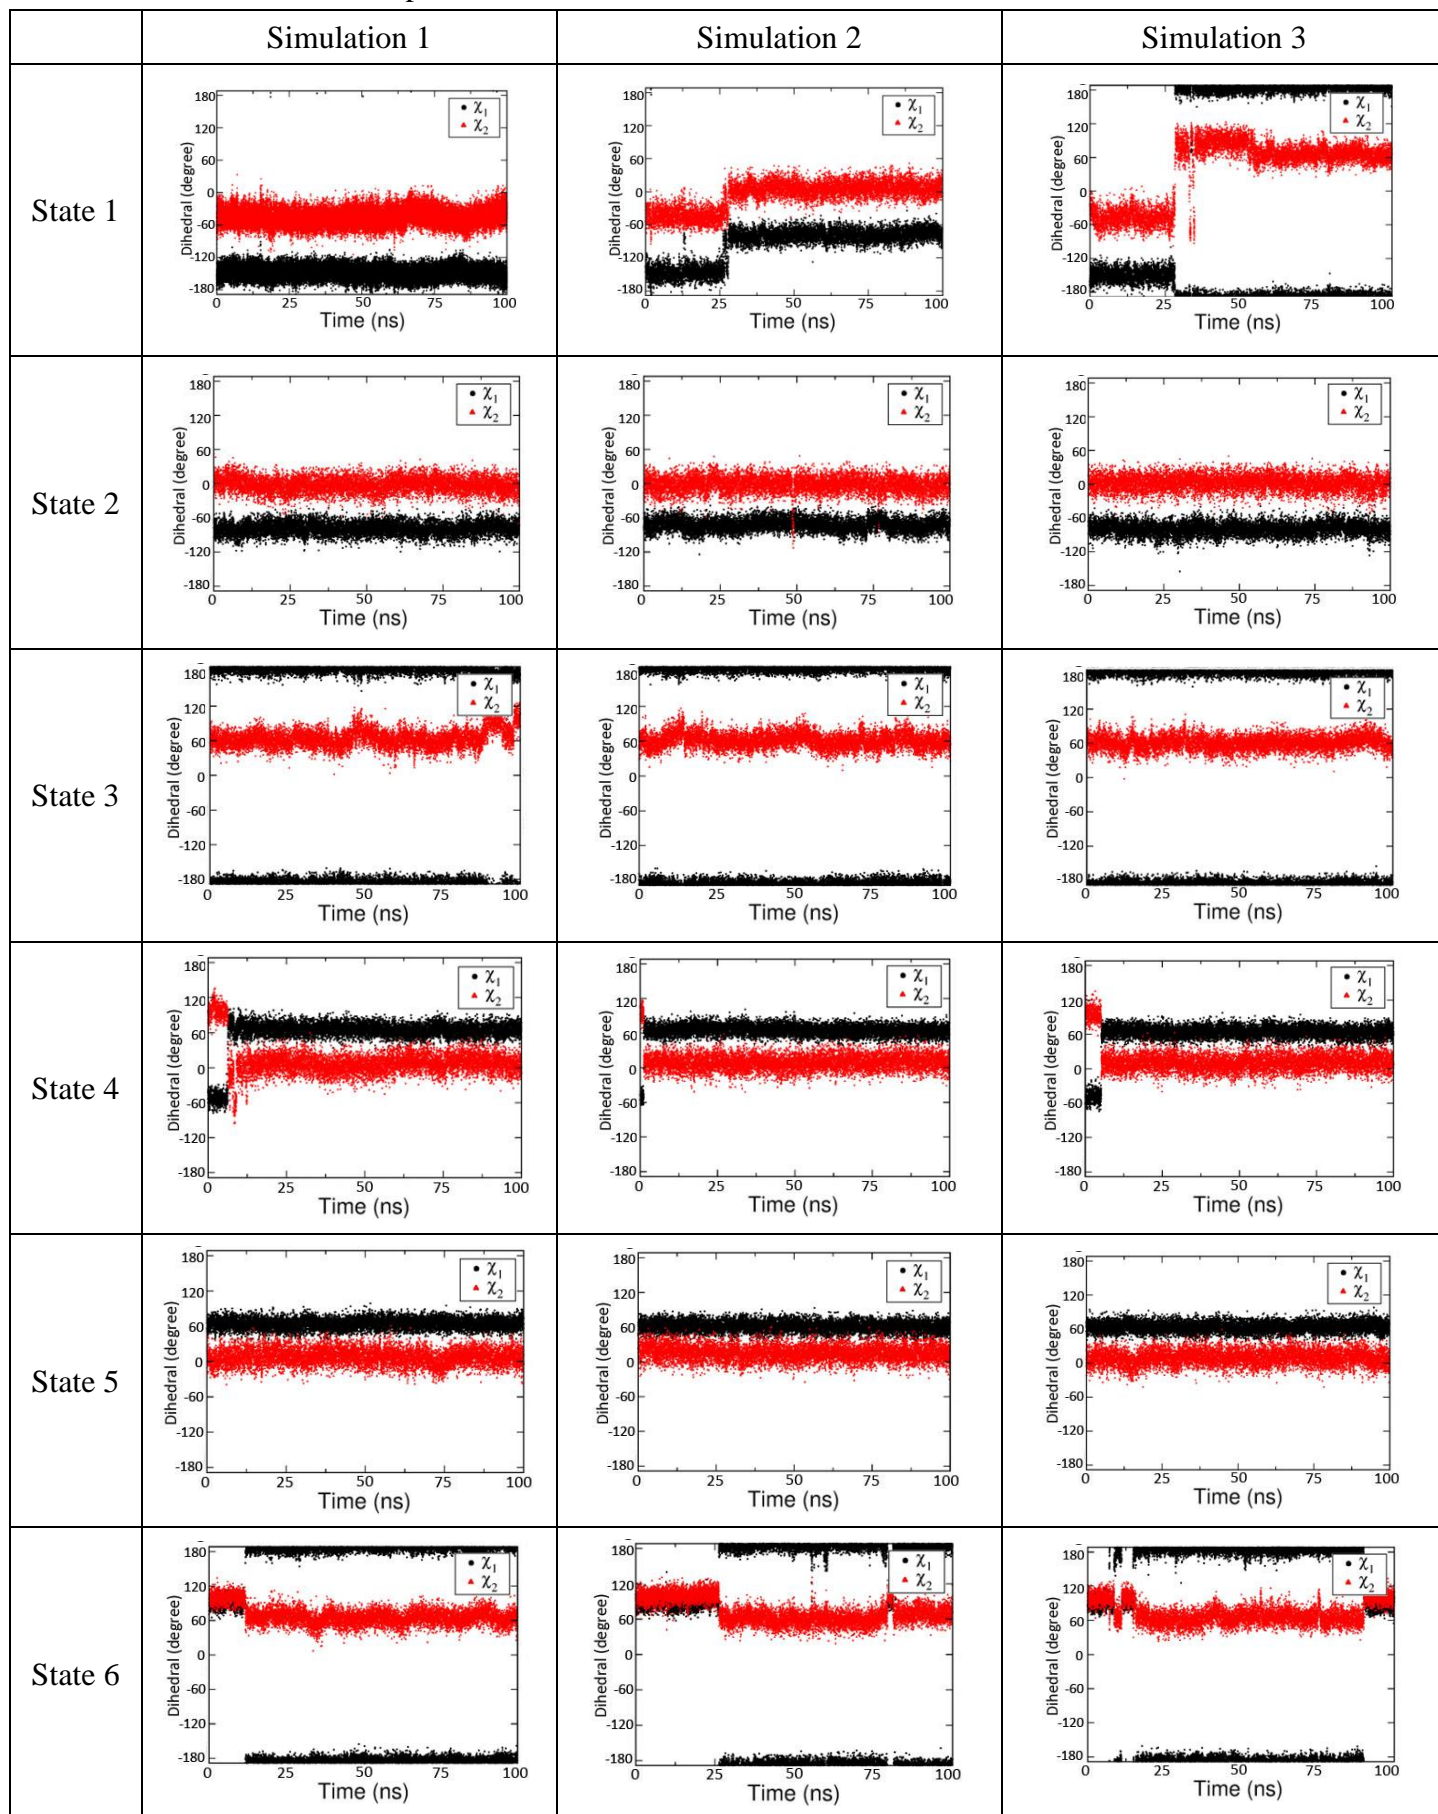

**Supplementary Table S2.** Decomposition of docking score for binding site residues of state 5.

|        | <sup>a</sup> E <sub>vdw</sub> (kcal/mol) | <sup>b</sup> E <sub>coul</sub> (kcal/mol) |
|--------|------------------------------------------|-------------------------------------------|
| Leu33  | -0.951                                   | 0.668                                     |
| Ser34  | -0.841                                   | -0.392                                    |
| Trp53  | -9.445                                   | 0.056                                     |
| Leu54  | -2.105                                   | -1.495                                    |
| Gln55  | -4.862                                   | 0.405                                     |
| Tyr91  | -1.931                                   | -2.805                                    |
| Leu116 | -4.601                                   | -0.730                                    |
| Ser144 | -1.172                                   | -9.331                                    |
| Trp145 | -4.957                                   | -4.484                                    |
| Tyr184 | -6.300                                   | -2.325                                    |
| Cys186 | -2.839                                   | -0.615                                    |
| Cys187 | -1.267                                   | -1.085                                    |
| Tyr191 | -3.074                                   | 0.942                                     |

<sup>a</sup> Van der Waals energy decomposition from Glide docking;

<sup>b</sup> Electrostatic energy decomposition from Glide docking.

**Supplementary Table S3.** Hydrogen bond analysis for ASEM and Trp145 in state 5.

| #Acceptor       | DonorH          | Donor          | Frames     | Frac         | AvgDist     | AvgAng        |
|-----------------|-----------------|----------------|------------|--------------|-------------|---------------|
| <b>Trp145@O</b> | <b>ASEM@H20</b> | <b>ASEM@N1</b> | <b>638</b> | <b>0.638</b> | <b>2.81</b> | <b>148.8°</b> |

**Supplementary Table S4.** MM/GBSA decomposition for binding site residues of state 5.

| Residue                  | <sup>*</sup> (+)Tyr91 | (+)Trp145  | (+)Tyr184  | (+)Glu185  | (+)Cys186  | (+)Tyr191  | (-)Ser34   | (-)Trp53   | (-)Gln55   | (-)Leu116  |
|--------------------------|-----------------------|------------|------------|------------|------------|------------|------------|------------|------------|------------|
| $\Delta G$<br>(kcal/mol) | -1.50±1.20            | -1.92±0.88 | -3.60±0.66 | -1.92±0.43 | -3.09±0.57 | -2.43±0.56 | -1.36±0.32 | -3.35±0.47 | -0.88±0.42 | -0.94±0.31 |

<sup>\*</sup> (+) represents the principal face and (-) the complementary face.
